# Supplementary material for: On the Effect of Bilateral Eye Movements on Memory Retrieval in Ageing and Dementia
Source: MDPI journal article supplement (doi:10.3390/brainsci12101299), 2022-09-27
Supplement: s1 [file s1]

## Supplementary Materials

### Experiment 1 – Word list 1

| Target Words | Foil words |
|--------------|------------|
| Evidence     | Industry   |
| Ceremony     | Series     |
| Patent       | Volume     |
| Miracle      | Research   |
| Session      | Origin     |
| Oxygen       | Folly      |
| Product      | Answer     |
| Master       | Mischief   |
| Conquest     | Silence    |
| Disease      | Instance   |
| Errand       | Quality    |
| Marriage     | Excuse     |
| Safety       | Pleasure   |
| Disaster     | Devil      |
| Maker        | Colony     |
| Property     | Salary     |
| Odour        | Heaven     |
| Capacity     | Vapour     |
| Injury       | Opinion    |
| Coffee       | Agony      |
| Trouble      | Salute     |
| Decree       | Circuit    |
| Assault      | Poetry     |
| Event        | Fortune    |
| Circuit      | Tragedy    |
| Owner        | Array      |

|          |          |
|----------|----------|
| Tribute  | Effort   |
| Method   | Contents |
| Contract | History  |
| Amount   | Season   |
| Revolt   | Custom   |
| Vision   | Occasion |
| Quantity | Pressure |
| Poverty  | Welfare  |
| Ability  | Advice   |
| Comrade  | Lecture  |

## Experiment 2 – Additional word list 2

| Target Words | Foil words |
|--------------|------------|
| Diamond      | Clothing   |
| Ticket       | Cellar     |
| Captive      | Cattle     |
| Nephew       | Abode      |
| Dreamer      | Temple     |
| Hospital     | Insect     |
| Majority     | Charter    |
| Sunburn      | Palace     |
| Hearing      | Fabric     |
| Factory      | Peach      |
| Musician     | Bottle     |
| Twilight     | Jelly      |
| Sauce        | Alcohol    |
| Locker       | Stain      |
| Maiden       | Portal     |
| Hostage      | Shock      |
| Apple        | Baron      |

|          |          |
|----------|----------|
| Trunk    | Goddess  |
| Meadow   | Sickness |
| Engine   | Sunset   |
| Forehead | Flesh    |
| Toast    | Nursery  |
| Bullet   | Thief    |
| Avenue   | Hotel    |
| Fatigue  | Bacteria |
| Hound    | Settler  |
| Garments | Cottage  |
| Painter  | Impact   |
| Kettle   | Poster   |
| Author   | Wheat    |
| Snake    | Rattle   |
| Tower    | Mileage  |
| Metal    | Pudding  |
| Edition  | Spray    |
| Costume  | Bloom    |
| Clock    | Robber   |
